# Supplementary material for: Study on depolymerization kinetics of formic acid dimers in binary mixture
Source: Royal Society of Chemistry journal article supplement (doi:10.1039/d3cp01876h), 2023-01-01
Supplement: d3cp01876h1.pdf [file d3cp01876h1.pdf]

## Supplementary material

### Study on depolymerization kinetics of formic acid dimers in binary mixture

Yufei Han<sup>1,2</sup>, Zian Wang<sup>2</sup>, Ru Qiao, Jianwen Cheng, Caiying Jiang<sup>2,\*</sup>, Huigang Wang<sup>1,\*</sup>

<sup>1</sup>Hangzhou Institute of Advanced Studies, College of chemistry and life sciences, Zhejiang Normal University, 1108 Gengwen Road, Hangzhou 311231, Zhejiang, P. R. China. <sup>2</sup>Department of Chemistry, College of Life Sciences, Zhejiang Sci-Tech University, Hangzhou 310018, China.

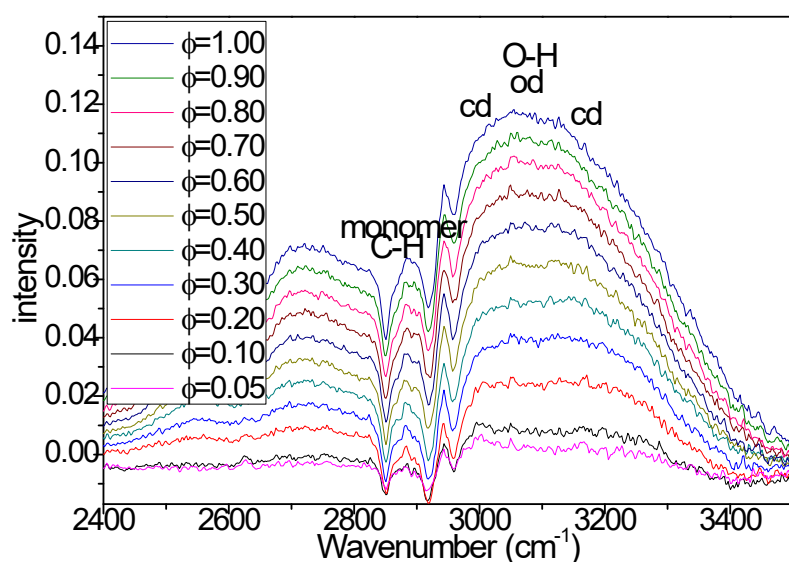

Fig S1 High resolution infrared spectroscopy of  $\nu_{\text{O-H}}$  and  $\nu_{\text{O-H}}$  ( $2400\text{-}3500\text{cm}^{-1}$ ) in FA/ $\text{CH}_3\text{CN}$  binary system at different volume fraction

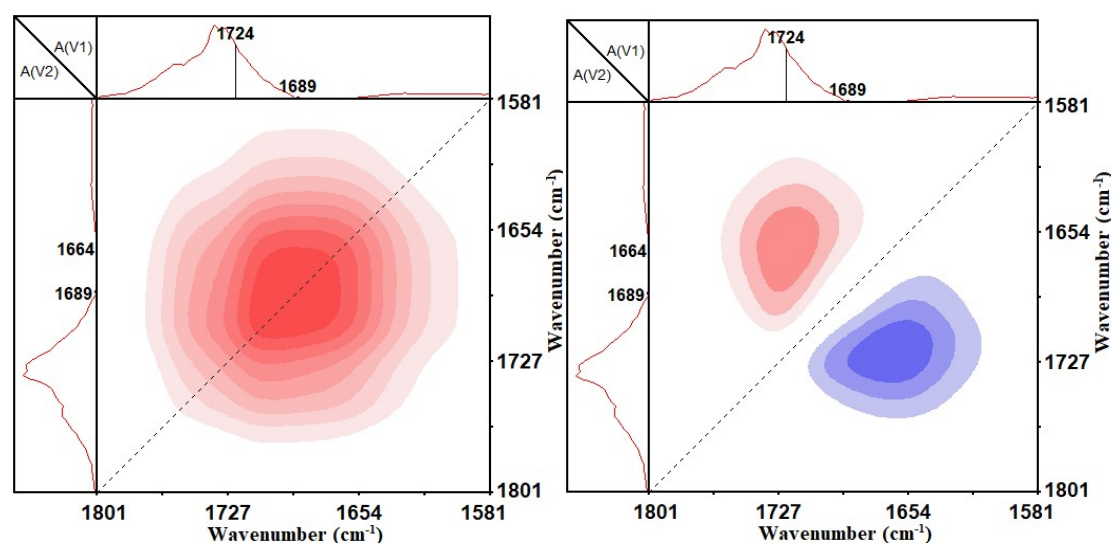

Fig S2 2-D IR of FA/ $\text{CH}_3\text{CN}$  binary system at different volume fraction

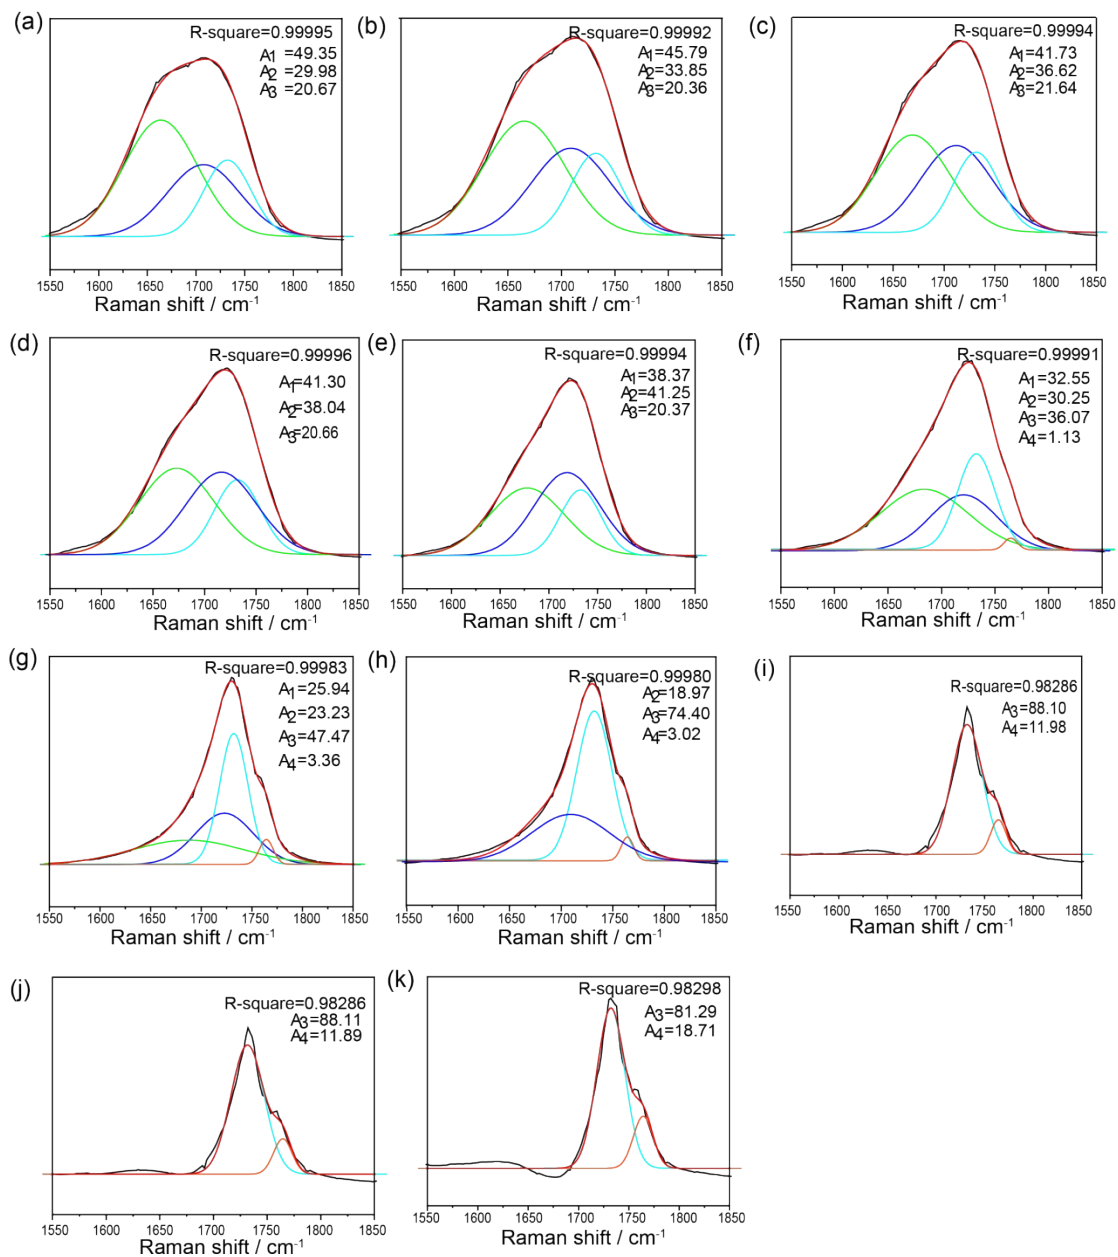

Fig S3 Band fitting for infrared spectroscopy of  $\nu_{C=O}$  (1540-1830cm<sup>-1</sup>) in FA/CH<sub>3</sub>CN binary mixture at different volume fraction

Table S1 The comparison of DFT (B3LYP-D3/6-311G (d,p)) calculated vibrational frequencies, depolarization ratio of FA-CH<sub>3</sub>CN, solvate FA monomer and FA dimer.

| Computed/cm <sup>-1</sup> |                                                                                                                                                     |                  |                     |             |                                        |                                        |                        |
|---------------------------|-----------------------------------------------------------------------------------------------------------------------------------------------------|------------------|---------------------|-------------|----------------------------------------|----------------------------------------|------------------------|
| mod<br>es                 | FA <sub>dimer</sub>                                                                                                                                 |                  | FA <sub>(PCM)</sub> |             | FA-CH <sub>3</sub> CN <sub>(PCM)</sub> |                                        | Descriptio<br>n        |
|                           | Freq.                                                                                                                                               | ρ                | Freq.               | ρ           | Freq.                                  | ρ                                      |                        |
| v <sub>1</sub>            | 3207/3086                                                                                                                                           | 0.47/0.31        | 3724                | 0.29        | 3388                                   | 0.32                                   | ν <sub>O-H</sub>       |
| v <sub>2</sub>            | 3065/3058                                                                                                                                           | 0.29/0.49        | 3062                | 0.27        | 3133/3133<br>/3057/2984                | 0.75/0.75/<br>0.01/0.24                | ν <sub>C-H</sub>       |
| v <sub>3</sub>            |                                                                                                                                                     |                  |                     |             | 2379                                   | 0.29                                   | ν <sub>N=C</sub>       |
| <b>v<sub>4</sub></b>      | <b>1789/1714</b>                                                                                                                                    | <b>0.73/0.11</b> | <b>1794</b>         | <b>0.34</b> | <b>1809</b>                            | <b>0.28</b>                            | <b>ν<sub>C=O</sub></b> |
| v <sub>5</sub>            | 1494/1457                                                                                                                                           | 0.39/0.58        | 1311                | 0.71        | 1391                                   | 0.68                                   | β <sub>H-O-C</sub>     |
| v <sub>6</sub>            |                                                                                                                                                     |                  |                     |             | 1454/1454/1403                         | 0.75/0.75/0.64                         | β <sub>H-C-H</sub>     |
| v <sub>7</sub>            | 1407/1406                                                                                                                                           | 0.74/0.75        | 1417                | 0.59        | 1430                                   | 0.56                                   | β <sub>H-C-O</sub>     |
| v <sub>8</sub>            | 1269/1267                                                                                                                                           | 0.20/0.21        | 1129                | 0.18        | 1184                                   | 0.39                                   | ν <sub>O-C</sub>       |
| v <sub>9</sub>            | 1107/1082                                                                                                                                           | 0.26/0.75        | 1067                | 0.75        |                                        |                                        | τ <sub>H-C-O-H</sub>   |
| v <sub>10</sub>           |                                                                                                                                                     |                  |                     |             | 1066                                   | 0.75                                   | τ <sub>H-C-O-N</sub>   |
| v <sub>11</sub>           |                                                                                                                                                     |                  |                     |             | 1059                                   | 0.74                                   | γ <sub>C-H-C-H</sub>   |
| v <sub>12</sub>           |                                                                                                                                                     |                  |                     |             | 1058                                   | 0.74                                   | τ <sub>H-C-C≡N</sub>   |
| v <sub>13</sub>           | 1003/983                                                                                                                                            | 0.73/0.75        | 684                 | 0.75        |                                        |                                        | τ <sub>H-O-C-O</sub>   |
| v <sub>14</sub>           |                                                                                                                                                     |                  |                     |             | 939                                    | 0.14                                   | ν <sub>C-C</sub>       |
| v <sub>15</sub>           |                                                                                                                                                     |                  |                     |             | 833                                    | 0.75                                   | τ <sub>C-O-H-N</sub>   |
| v <sub>16</sub>           | 725/694                                                                                                                                             | 0.67/0.66        | 630                 | 0.58        | 699                                    | 0.53                                   | β <sub>O-C-O</sub>     |
| v <sub>17</sub>           |                                                                                                                                                     |                  |                     |             | 404/402/<br>99/43/<br>29/15            | 0.75/0.75/<br>0.75/0.75/<br>0.75/0.75  | τ <sub>H-N≡C-C</sub>   |
| v <sub>18</sub>           | 287                                                                                                                                                 | 0.75             |                     |             |                                        |                                        | β <sub>O-H-O</sub>     |
| v <sub>19</sub>           | 277/77                                                                                                                                              | 0.75/0.75        |                     |             |                                        |                                        | τ <sub>O-C-O-H</sub>   |
| v <sub>20</sub>           | 216                                                                                                                                                 | 0.12             |                     |             |                                        |                                        | ν <sub>O-H</sub>       |
| v <sub>21</sub>           | 187                                                                                                                                                 | 0.74             |                     |             |                                        |                                        | τ <sub>C-O-H-O</sub>   |
| v <sub>22</sub>           |                                                                                                                                                     |                  |                     |             | 184                                    | 0.71                                   | ν <sub>N-H</sub>       |
| v <sub>23</sub>           | 178                                                                                                                                                 | 0.7              |                     |             |                                        |                                        | β <sub>C-O-H</sub>     |
| v <sub>24</sub>           |                                                                                                                                                     |                  |                     |             | 134                                    | 0.75                                   | τ <sub>O-C-O-N</sub>   |
| ZPE<br>(kJ/m<br>ol)       | CH <sub>3</sub> CN                                                                                                                                  |                  | FA <sub>dimer</sub> |             | FA <sub>(PCM)</sub>                    | FA-CH <sub>3</sub> CN <sub>(PCM)</sub> |                        |
|                           | HF=-348567.44                                                                                                                                       |                  | HF=-<br>996658.86   |             | HF=-498307.99                          | HF=-846893.58                          |                        |
| Remarks                   | ν,β,τ,γ refer the stretching vibration,bending vibration, twisting vibration and out-of-plane bending vibration respectively.ρ:depolarization ratio |                  |                     |             |                                        |                                        |                        |

Table S2 The comparison of DFT (B3LYP-D3/6-311G (d,p)) calculated vibrational frequencies, depolarization ratio and ZPE energy of cd and od.

| Computed/cm <sup>-1</sup> |                                                                                                                                                     |                  |                                   |                  |                        |
|---------------------------|-----------------------------------------------------------------------------------------------------------------------------------------------------|------------------|-----------------------------------|------------------|------------------------|
| modes                     | FA <sub>cd</sub>                                                                                                                                    |                  | FA <sub>od</sub>                  |                  | Description            |
|                           | Freq.                                                                                                                                               | ρ                | Freq.                             | ρ                |                        |
| <b>v<sub>1</sub></b>      | <b>3207/3086</b>                                                                                                                                    | <b>0.47/0.31</b> | <b>3729/3372</b>                  | <b>0.29/0.31</b> | <b>v<sub>O-H</sub></b> |
| v <sub>2</sub>            | 3065/3058                                                                                                                                           | 0.29/0.49        | 3113/3030                         | 0.21/0.29        | v <sub>C-H</sub>       |
| <b>v<sub>3</sub></b>      | <b>1789/1714</b>                                                                                                                                    | <b>0.73/0.11</b> | <b>1807/1761</b>                  | <b>0.54/0.17</b> | <b>v<sub>O=C</sub></b> |
| v <sub>4</sub>            | 1494/1457                                                                                                                                           | 0.39/0.58        | 1449/1408                         | 0.52/0.75        | β <sub>H-O-C</sub>     |
| v <sub>5</sub>            | 1407/1406                                                                                                                                           | 0.74/0.75        | 1386/1336                         | 0.76/0.49        | β <sub>H-C-O</sub>     |
| v <sub>6</sub>            | 1269/1267                                                                                                                                           | 0.2/0.21         | 1218/1165                         | 0.22/0.26        | v <sub>O-C</sub>       |
|                           | 1107/1082                                                                                                                                           | 0.26/0.75        | 1107/1074                         | 0.75/0.75        | τ <sub>H-C-O-H</sub>   |
| v <sub>7</sub>            | 1003/983                                                                                                                                            | 0.73/0.75        | 992/723                           | 0.75/0.75        | τ <sub>H-O-C=O</sub>   |
| v <sub>8</sub>            | 725/694                                                                                                                                             | 0.67/0.66        | 688/653                           | 0.62/0.61        | β <sub>O-C-O</sub>     |
| v <sub>9</sub>            | 287                                                                                                                                                 | 0.75             | 156                               | 0.44             | β <sub>O-H-O</sub>     |
| v <sub>10</sub>           | 277/77                                                                                                                                              | 0.75/0.75        | 215/67                            | 0.75/0.75        | τ <sub>O-C-O-H</sub>   |
| v <sub>11</sub>           | 216                                                                                                                                                 | 0.12             | 199                               | 0.67             | v <sub>O-H</sub>       |
| v <sub>12</sub>           | 187                                                                                                                                                 | 0.74             | 117                               | 0.75             | τ <sub>C-O-H-O</sub>   |
| v <sub>13</sub>           | 178                                                                                                                                                 | 0.7              | 126                               | 0.66             | β <sub>C-O-H</sub>     |
| ZPE energy<br>(kJ/mol)    | FA <sub>cd</sub><br>HF=-996658.86                                                                                                                   |                  | FA <sub>od</sub><br>HF=-996628.05 |                  |                        |
| Remarks                   | v,β,τ,γ refer the stretching vibration,bending vibration, twisting vibration and out-of-plane bending vibration respectively.ρ:depolarization ratio |                  |                                   |                  |                        |

Table S3 The comparison of DFT (B3LYP-D3/6-311G (d,p)) calculated vibrational frequencies, depolarization ratio and ZPE of FA<sub>dimer</sub>, FA<sub>dimer</sub>-CH<sub>3</sub>OH<sub>dimer</sub>, FA-CH<sub>3</sub>OH<sub>(PCM)</sub> and FA<sub>(PCM)</sub>

| mode            | Computed/cm <sup>-1</sup> |              |                                                          |                 |                                        |             |                     |             | Descrip<br>tion                                                |      |      |
|-----------------|---------------------------|--------------|----------------------------------------------------------|-----------------|----------------------------------------|-------------|---------------------|-------------|----------------------------------------------------------------|------|------|
|                 | FA <sub>dimer</sub>       |              | FA <sub>dimer</sub> -CH <sub>3</sub> OH <sub>dimer</sub> |                 | FA-CH <sub>3</sub> OH <sub>(PCM)</sub> |             | FA <sub>(PCM)</sub> |             |                                                                |      |      |
|                 | Freq.                     | ρ            | Freq.                                                    | ρ               | Freq.                                  | ρ           | Freq.               | ρ           |                                                                |      |      |
| v <sub>1</sub>  | 3207/                     | 0.47/        | 3509/                                                    | 0.32/           | 3829/                                  | 0.26/       | 3724                | 0.29        | ν <sub>O-H</sub>                                               |      |      |
|                 | 3086                      | 0.31         | 3464                                                     | 0.25            | 3127                                   | 0.29        |                     |             |                                                                |      |      |
| v <sub>2</sub>  | 3065/                     | 0.29/        | 3117/3113/                                               | 0.65/0.67/      | 3148/                                  | 0.59/       | 3062                | 0.27        | ν <sub>C-H</sub>                                               |      |      |
|                 |                           |              | 3088/3078/                                               | 0.74/0.74/      | 3088/                                  | 0.74/       |                     |             |                                                                |      |      |
|                 |                           |              | 3043/3041/                                               | 0.68/0.20/      | 3027/                                  | 0.12/       |                     |             |                                                                |      |      |
| v <sub>3</sub>  |                           |              | 3022/3019/                                               | 0.04/0.04       | 3019                                   | 0.73        |                     |             | ν <sub>O-H</sub>                                               |      |      |
|                 |                           |              | 2907/2850                                                | 0.48/0.28       |                                        |             |                     |             |                                                                |      |      |
| v <sub>4</sub>  | <b>1789</b>               | <b>0.73/</b> | <b>1771/1743</b>                                         | <b>0.54/0.1</b> | <b>1762</b>                            | <b>0.16</b> | <b>1795</b>         | <b>0.34</b> | ν <sub>C=O</sub>                                               |      |      |
|                 | <b>/1714</b>              | <b>0.11</b>  |                                                          |                 |                                        |             |                     |             |                                                                |      |      |
| v <sub>5</sub>  | 1494/                     | 0.39/        |                                                          |                 |                                        |             | 1311                | 0.71        | β <sub>H-O-C</sub>                                             |      |      |
|                 | 1457                      | 0.58         |                                                          |                 |                                        |             |                     |             |                                                                |      |      |
| v <sub>6</sub>  |                           |              | 1530/1526/                                               | 0.68/0.74/      | 1502/                                  | 0.72/       |                     |             | β <sub>H-C-H</sub>                                             |      |      |
|                 |                           |              | 1511/1499/                                               | 0.60/0.66/      |                                        |             |                     |             |                                                                | 1493 | 0.73 |
|                 |                           |              | 1493/1488/                                               | 0.75/0.75/      |                                        |             |                     |             |                                                                |      |      |
| v <sub>7</sub>  |                           |              | 1482                                                     | 0.72            | 1483                                   | 0.56        |                     |             | τ <sub>H-C-H-O</sub>                                           |      |      |
|                 |                           |              | 1477                                                     | 0.74            |                                        |             |                     |             |                                                                |      |      |
| v <sub>8</sub>  | 1407/                     | 0.74/        | 1415/1409/                                               | 0.70/0.68/      | 1407                                   | 0.66        | 1417                | 0.59        | β <sub>H-C-O</sub>                                             |      |      |
|                 | 1406                      | 0.75         | 1183/1178/                                               | 0.75/0.74/      |                                        |             |                     |             |                                                                |      |      |
| v <sub>9</sub>  |                           |              | 1152/1124                                                | 0.73/0.63       | 1468                                   | 0.75        |                     |             | β <sub>C-O-H</sub>                                             |      |      |
|                 |                           |              | 1464/1441                                                | 0.75/0.66       |                                        |             |                     |             |                                                                |      |      |
| v <sub>10</sub> | 1269                      | 0.20/        | 1281/1277/                                               | 0.57/0.30/      | 1216/                                  | 0.48/       | 1129                | 0.18        | ν <sub>O-C</sub>                                               |      |      |
|                 | /1267                     | 0.21         | 1056/1047                                                | 0.34/0.22       | 1017                                   | 0.32        |                     |             |                                                                |      |      |
| v <sub>11</sub> |                           |              | 1219/151                                                 | 0.73/0.68       |                                        |             |                     |             | τ <sub>C-O-H-O</sub>                                           |      |      |
| v <sub>12</sub> | 1107                      | 0.26/        |                                                          |                 | 1175/                                  | 0.75/       | 1067                | 0.75        | τ <sub>H-C-O-H</sub>                                           |      |      |
|                 | /1082                     | 0.75         |                                                          |                 | 1084/                                  | 0.51/       |                     |             |                                                                |      |      |
| v <sub>13</sub> |                           |              |                                                          |                 | 1078                                   | 0.46        |                     |             |                                                                |      |      |
| v <sub>14</sub> |                           |              | 1106                                                     | 0.56            |                                        |             |                     |             | τ <sub>O-H-O-O</sub><br>ν <sub>O-C</sub> +τ <sub>H-C-O-O</sub> |      |      |
| v <sub>15</sub> | 1003/                     | 0.73/        | 1064                                                     | 0.45            |                                        |             | 684                 | 0.75        | τ <sub>H-O-C-O</sub>                                           |      |      |
|                 | 983                       | 0.75         |                                                          |                 |                                        |             |                     |             |                                                                |      |      |
| v <sub>16</sub> |                           |              |                                                          | 0.22/0.73/      | 1365/                                  | 0.73/       |                     |             |                                                                |      |      |
| v <sub>17</sub> |                           |              | 765/118/28                                               | 0.75            | 390                                    | 0.74        |                     |             | β <sub>H-O-H</sub>                                             |      |      |
|                 |                           |              | 710/705                                                  | 0.67/0.59       | 701                                    | 0.49        |                     |             |                                                                |      |      |
| v <sub>18</sub> | 725/                      | 0.67/        |                                                          |                 |                                        |             | 630                 | 0.58        | β <sub>O-C-O</sub>                                             |      |      |
|                 | 694                       | 0.66         |                                                          |                 |                                        |             |                     |             |                                                                |      |      |
| v <sub>19</sub> | 287                       | 0.75         | 226/97                                                   | 0.74/0.69       |                                        |             |                     |             | β <sub>O-H-O</sub>                                             |      |      |
| v <sub>20</sub> | 277/77                    | 0.75/        | 1032/67                                                  | 0.29/0.73       | 958/209                                | 0.69/       |                     |             | τ <sub>O-C-O-H</sub>                                           |      |      |

|                 |                                                                                                                                                     |      |                                      |                                                                            |                                                      |                                      |                      |
|-----------------|-----------------------------------------------------------------------------------------------------------------------------------------------------|------|--------------------------------------|----------------------------------------------------------------------------|------------------------------------------------------|--------------------------------------|----------------------|
|                 |                                                                                                                                                     | 0.75 |                                      |                                                                            |                                                      | 0.74                                 |                      |
|                 |                                                                                                                                                     |      |                                      |                                                                            |                                                      | 0.75/                                |                      |
| v <sub>21</sub> | 216                                                                                                                                                 | 0.12 | 369/335/17<br>8                      | 0.69/0.65/<br>0.75                                                         | 256/168<br>/118                                      | 0.68/<br>0.75                        | v <sub>O-H</sub>     |
| v <sub>22</sub> | 187                                                                                                                                                 | 0.74 | 827/47                               | 0.74/0.75                                                                  |                                                      |                                      | τ <sub>C-O-H-O</sub> |
| v <sub>23</sub> |                                                                                                                                                     |      | 255                                  | 0.75                                                                       |                                                      |                                      | τ <sub>H-C-O-O</sub> |
| v <sub>24</sub> |                                                                                                                                                     |      | 246                                  | 0.75                                                                       |                                                      |                                      | τ <sub>H-C-O-H</sub> |
| v <sub>25</sub> | 178                                                                                                                                                 | 0.7  | 125/112/76                           | 0.73/0.70/<br>0.74                                                         |                                                      |                                      | β <sub>C-O-H</sub>   |
| v <sub>26</sub> |                                                                                                                                                     |      | 137/92                               | 0.75/0.70                                                                  | 107/27                                               | 0.75/<br>0.75                        | τ <sub>H-C-H-O</sub> |
| v <sub>27</sub> |                                                                                                                                                     |      | 32                                   | 0.75                                                                       |                                                      |                                      | τ <sub>O-H-O-C</sub> |
| ZPE             | CH <sub>3</sub> O                                                                                                                                   |      |                                      |                                                                            |                                                      |                                      |                      |
| energy          | H                                                                                                                                                   |      |                                      |                                                                            |                                                      | FA-                                  |                      |
| (KJ/mol)        | HF=-30378                                                                                                                                           |      | FA <sub>dimer</sub><br>HF=-996658.86 | FA <sub>dimer</sub> -CH <sub>3</sub> OH <sub>dimer</sub><br>HF=-1604359.68 | CH <sub>3</sub> OH <sub>(PCM)</sub><br>HF=-802158.67 | FA <sub>(PCM)</sub><br>HF=-498307.91 |                      |
| Remarks         | ν,β,τ,γ refer the stretching vibration,bending vibration, twisting vibration and out-of-plane bending vibration respectively.ρ:depolarization ratio |      |                                      |                                                                            |                                                      |                                      |                      |

Table S4 The comparison of DFT (B3LYP-D3/6-311G (d,p)) calculated vibrational frequencies, depolarization ratio of cd and od

| Computed/cm <sup>-1</sup> |                                                                                                                                                     |                  |                                   |                  |                        |
|---------------------------|-----------------------------------------------------------------------------------------------------------------------------------------------------|------------------|-----------------------------------|------------------|------------------------|
| modes                     | FA <sub>cd</sub>                                                                                                                                    |                  | FA <sub>od</sub>                  |                  | Description            |
|                           | Freq.                                                                                                                                               | ρ                | Freq.                             | ρ                |                        |
| <b>v<sub>1</sub></b>      | <b>3207/3086</b>                                                                                                                                    | <b>0.47/0.31</b> | <b>3729/3372</b>                  | <b>0.29/0.31</b> | <b>v<sub>O-H</sub></b> |
| v <sub>2</sub>            | 3065/3058                                                                                                                                           | 0.29/0.49        | 3113/3030                         | 0.21/0.29        | v <sub>C-H</sub>       |
| <b>v<sub>3</sub></b>      | <b>1789/1714</b>                                                                                                                                    | <b>0.73/0.11</b> | <b>1807/1761</b>                  | <b>0.54/0.17</b> | <b>v<sub>O=C</sub></b> |
| v <sub>4</sub>            | 1494/1457                                                                                                                                           | 0.39/0.58        | 1449/1408                         | 0.52/0.75        | β <sub>H-O-C</sub>     |
| v <sub>5</sub>            | 1407/1406                                                                                                                                           | 0.74/0.75        | 1386/1336                         | 0.76/0.49        | β <sub>H-C-O</sub>     |
| v <sub>6</sub>            | 1269/1267                                                                                                                                           | 0.2/0.21         | 1218/1165                         | 0.22/0.26        | v <sub>O-C</sub>       |
|                           | 1107/1082                                                                                                                                           | 0.26/0.75        | 1107/1074                         | 0.75/0.75        | τ <sub>H-C-O-H</sub>   |
| v <sub>7</sub>            | 1003/983                                                                                                                                            | 0.73/0.75        | 992/723                           | 0.75/0.75        | τ <sub>H-O-C=O</sub>   |
| v <sub>8</sub>            | 725/694                                                                                                                                             | 0.67/0.66        | 688/653                           | 0.62/0.61        | β <sub>O-C-O</sub>     |
| v <sub>9</sub>            | 287                                                                                                                                                 | 0.75             | 156                               | 0.44             | β <sub>O-H-O</sub>     |
| v <sub>10</sub>           | 277/77                                                                                                                                              | 0.75/0.75        | 215/67                            | 0.75/0.75        | τ <sub>O-C-O-H</sub>   |
| v <sub>11</sub>           | 216                                                                                                                                                 | 0.12             | 199                               | 0.67             | v <sub>O-H</sub>       |
| v <sub>12</sub>           | 187                                                                                                                                                 | 0.74             | 117                               | 0.75             | τ <sub>C-O-H-O</sub>   |
| v <sub>13</sub>           | 178                                                                                                                                                 | 0.7              | 126                               | 0.66             | β <sub>C-O-H</sub>     |
| ZPE energy<br>(kJ/mol)    | FA <sub>cd</sub><br>HF=-996658.86                                                                                                                   |                  | FA <sub>od</sub><br>HF=-996628.05 |                  |                        |
| Remarks                   | v,β,τ,γ refer the stretching vibration,bending vibration, twisting vibration and out-of-plane bending vibration respectively.ρ:depolarization ratio |                  |                                   |                  |                        |
